# Supplementary material for: Common and rare variants of WNT16, DKK1 and SOST and their relationship with bone mineral density
Source: PubMed Central journal article supplement (PMC6053384; doi:10.1038/s41598-018-29242-8), 2018-07-19
Supplement: 41598_2018_29242_MOESM1_ESM.pdf [file 41598_2018_29242_MOESM1_ESM.pdf]

# **Common and rare variants of *WNT16*, *DKK1* and *SOST* and their relationship with bone mineral density**

Núria Martínez-Gil<sup>1</sup>, Neus Roca-Ayats<sup>1</sup>, Anna Monistrol-Mula<sup>1</sup>, Natàlia García-Giralt<sup>2</sup>, Adolfo Díez-Pérez<sup>2</sup>, Xavier Nogués<sup>2</sup>, Leonardo Mellibovsky<sup>2</sup>, Daniel Grinberg<sup>1#</sup>, Susana Balcells<sup>1#\*</sup>

<sup>1</sup>Department of Genetics, Microbiology and Statistics, Faculty of Biology, University of Barcelona, IBUB, IRSJD, CIBERER, Barcelona, Spain

<sup>2</sup>Musculoskeletal Research Group, IMIM (Hospital del Mar Medical Research Institute), Centro de Investigación Biomédica en Red de Fragilidad y Envejecimiento Saludable (CIBERFES), ISCIII, Barcelona, Spain

**Supplementary Table S1.** Variants that affect the binding of miRNA at least in 3 different miRNA databases (MiRNSP; miRNA-SNP; SNP Function Prediction; MicroSNiPer; miRdSNP; miRTarBase).

| Gene  | Variant     | miRNA                             | Gain/loss | Log FC # | Adj. p-val #   |
|-------|-------------|-----------------------------------|-----------|----------|----------------|
| WNT16 | rs17143305  | hsa-miR-541                       | Gain      | *        | Ns             |
|       |             | hsa-mir4263                       | Gain      | *        | Ns             |
|       | rs190011371 | hsa-miR-383                       | Loss      | -0.527   | <b>0.00408</b> |
| SOST  | rs17883310  | hsa-miR-1915-3p                   | Loss      | 1.58     | <b>0.00104</b> |
|       | rs17886183  | hsa-miR-5583                      | Gain      | *        | Ns             |
|       |             | hsa-miR-98-5p                     | Loss      | *        | Ns             |
|       | rs75901553  | hsa-miR-3190                      | Gain      | *        | Ns             |
|       |             | hsa-miR-let-7a<br>(and b.c.d.f.g) | Loss      | -1.819   | <b>0.007</b>   |

Gain: Minor allele creates a new binding site for the miRNA

Loss: Minor allele abolish the binding site for the miRNA

# Data from De Ugarte et al. (2015)<sup>1</sup>. Data not shown in the publication.

logFC: Logarithm (Osteoporotic/Non-osteoporotic)

\* logFC < |0.5|; Ns < 0.05

**Supplementary Table S2.** GTEx eQTL data for all the SNVs found in the resequencing of *WNT16*, *DKK1* and *SOST*

| SNP          | Gene                | p value  | NES                          | Tissue                                   |
|--------------|---------------------|----------|------------------------------|------------------------------------------|
| <i>WNT16</i> |                     |          |                              |                                          |
| rs17143281   | <i>FAM3C</i>        | 1.3e-11  | 0.65                         | Muscle - Skeletal                        |
| rs55710688   | <i>FAM3C</i>        | 0.000020 | 0.20                         | Skin - Not Sun Exposed (Suprapubic)      |
|              |                     | 0.000016 | 0.18                         | Skin - Sun Exposed (Lower leg)           |
|              | <b><i>WNT16</i></b> | 0.000019 | 0.29                         | Adipose - Subcutaneous                   |
| rs2908004    | <i>CPED1</i>        | 0.000029 | 0.097                        | Artery - Tibial                          |
|              | <i>FAM3C</i>        | 0.000086 | -0.15                        | Skin - Sun Exposed (Lower leg)           |
| rs142005327  | <i>FAM3C</i>        | 5.9e-8   | 0.22                         | Skin - Not Sun Exposed (Suprapubic)      |
|              |                     | 9.5e-7   | 0.20                         | Skin - Sun Exposed (Lower leg)           |
|              |                     | 0.000032 | 0.13                         | Nerve - Tibial                           |
|              | <i>CPED1</i>        | 0.000029 | 0.11                         | Artery - Tibial                          |
| rs2707466    | <i>FAM3C</i>        | 0.000050 | -0.15                        | Skin - Sun Exposed (Lower leg)           |
|              | <i>CPED1</i>        | 0.000058 | 0.094                        | Artery - Tibial                          |
| rs17143305   | <i>RP11-3L10.1</i>  | 7.5e-14  | 0.87                         | Testis                                   |
|              | <i>FAM3C</i>        | 2.9e-29  | -0.52                        | Skin - Sun Exposed (Lower leg)           |
|              |                     | 5.9e-26  | -0.51                        | Skin - Not Sun Exposed (Suprapubic)      |
|              |                     | 2.7e-8   | -0.21                        | Nerve - Tibial                           |
|              |                     | 4.6e-8   | -0.22                        | Thyroid                                  |
|              |                     | 7.8e-8   | -0.27                        | Stomach                                  |
|              |                     | 8.8e-8   | -0.34                        | Esophagus - Mucosa                       |
|              |                     | 1.0e-7   | -0.42                        | Adrenal Gland                            |
|              |                     | 1.0e-7   | -0.29                        | Muscle - Skeletal                        |
|              |                     | 1.1e-7   | -0.77                        | Brain - Spinal cord (cervical c-1)       |
|              |                     | 4.8e-7   | -0.20                        | Adipose - Subcutaneous                   |
|              |                     | 9.5e-7   | -0.31                        | Brain - Anterior cingulate cortex (BA24) |
|              |                     | 0.000028 | -0.35                        | Pancreas                                 |
|              |                     | 0.000031 | -0.21                        | Adipose - Visceral (Omentum)             |
|              |                     | 0.000032 | -0.24                        | Breast - Mammary Tissue                  |
|              |                     | 0.000058 | -0.17                        | Artery - Tibial                          |
|              | 0.000087            | -0.18    | Esophagus - Muscularis       |                                          |
|              | 0.000022            | -0.28    | Brain - Frontal Cortex (BA9) |                                          |
|              | 0.000027            | -0.30    | Brain - Cortex               |                                          |
| <i>DKK1</i>  |                     |          |                              |                                          |
| rs41281546   | <b><i>DKK1</i></b>  | 8.6e-7   | -0.29                        | Cells - Transformed fibroblasts          |
| rs1569198    | <i>PRKG1-AS1</i>    | 0.000047 | 0.16                         | Cells - Transformed fibroblasts          |
| rs74711339   | <b><i>DKK1</i></b>  | 1.3e-7   | -0.35                        | Cells - Transformed fibroblasts          |
| <i>SOST</i>  |                     |          |                              |                                          |
| rs1237278    | <b><i>SOST</i></b>  | 8.9e-18  | -0.26                        | Artery - Tibial                          |
|              |                     | 3.6e-9   | -0.61                        | Brain - Cortex                           |
|              |                     | 5.4e-9   | -0.27                        | Artery - Aorta                           |
|              |                     | 1.1e-7   | -0.43                        | Artery - Coronary                        |
|              |                     | 0.000024 | -0.28                        | Heart - Atrial Appendage                 |
|              |                     | 0.000013 | 0.22                         | Thyroid                                  |
| rs851058     | <i>MPP3</i>         | 0.000063 | -0.17                        | Cells - Transformed fibroblasts          |
|              | <b><i>SOST</i></b>  | 3.4e-20  | -0.28                        | Artery - Tibial                          |
|              |                     | 1.1e-10  | -0.29                        | Artery - Aorta                           |
|              |                     | 1.2e-8   | -0.47                        | Artery - Coronary                        |
|              |                     | 4.2e-7   | -0.35                        | Heart - Atrial Appendage                 |
| rs2023794    | <i>DUSP3</i>        | 0.000069 | 0.10                         | Cells - Transformed fibroblasts          |
|              | <i>DUSP3</i>        | 6.0e-7   | 0.29                         | Cells - Transformed fibroblasts          |
|              | <i>MPP2</i>         | 0.000022 | 0.46                         | Skin - Not Sun Exposed (Suprapubic)      |
|              |                     | 0.000048 | 0.50                         | Skin - Sun Exposed (Lower leg)           |

NES: Normalized Effect Size

**Supplementary Table S3.** Minor allele frequency (MAF) from 1000 genomes project: total population (ALL), european population (EUR) and Iberian population in Spain (IBS) and the complete BARCOS cohort frequency.

| SNP                 | Minor allele | ALL    | EUR   | IBS   | BARCOS cohort |
|---------------------|--------------|--------|-------|-------|---------------|
| <b><i>WNT16</i></b> |              |        |       |       |               |
| rs55710688          | CCCA         | 0.252  | 0.233 | 0.276 | 0.257         |
| rs2908004           | A            | 0.510  | 0.443 | 0.416 | 0.445         |
| rs142005327         | CT           | 0.257  | 0.254 | 0.29  | 0.28          |
| rs113001389         | A            | 0.004  | 0     | 0     | 0.0007        |
| rs2707466           | T            | 0.503  | 0.440 | 0.407 | 0.463         |
| rs190011371         | C            | 0.001  | 0     | 0     | 0.002         |
| <b><i>DKK1</i></b>  |              |        |       |       |               |
| rs1569198           | A            | 0.682  | 0.507 | 0.477 | 0.468         |
| rs74711339          | G            | 0.019  | 0.043 | 0.033 | 0.057         |
| <b><i>SOST</i></b>  |              |        |       |       |               |
| rs1237278           | C            | 0.436  | 0.355 | 0.425 | 0.392         |
| rs2023794           | C            | 0.074  | 0.044 | 0.037 | 0.056         |
| rs570754792         | A            | 0.0004 | 0.002 | 0.005 | 0.001         |
| rs17882143          | T            | 0.007  | 0.018 | 0.033 | 0.023         |
| rs17883310          | A            | 0.009  | 0.013 | 0.023 | 0.018         |

**Supplementary Table S4.** Effect size of the associated variants

| SNP                    | Position                                 | Type       | Effect size ( $\beta$ and OR)                              |                                               |
|------------------------|------------------------------------------|------------|------------------------------------------------------------|-----------------------------------------------|
|                        |                                          |            | LS-BMD                                                     | FN-BMD                                        |
| <i>WNT16</i>           |                                          |            |                                                            |                                               |
| rs55710688             | p.Met1?<br>g.120965467_120965470dupCCCA  | Fs<br>5'UP | 0.018 (0.006, 0.031)<br>1.019 (1.006, 1.031)               | 0.009 (0.0001, 0.019)<br>1.01 (1.0001, 1.019) |
| rs2908004              | p.G72R/p.G82R                            | M          | 0.012 (0.0015, 0.023)<br>1.012 (1.001, 1.023)              |                                               |
| rs142005327            | c.346+103_104dupCT<br>c.316+103_104dupCT | I          | 0.018 (0.006, 0.03)<br>1.018 (1.006, 1.031)                | 0.011 (0.002, 0.02)<br>1.011 (1.002, 1.02)    |
| rs2707466              | p.T253I/p.T263I                          | M          | 0.014 (0.002, 0.026)<br>1.014 (1.002, 1.026)               | 0.01 (0.002, 0.019)<br>1.01 (1.002, 1.019)    |
| rs3801387 <sup>#</sup> | c.603+2747A>G<br>c.633+2747A>G           | I          | 0.017 (0.005, 0.03)<br>1.017 (1.005, 1.03)                 | 0.01 (0.0004, 0.019)<br>1.01 (1.0004, 1.019)  |
| <i>DKK1</i>            |                                          |            |                                                            |                                               |
| rs1569198              | c.548-43A>G                              | I          |                                                            | 0.011 (0.003, 0.019)<br>1.011 (1.003, 1.019)  |
| <i>SOST</i>            |                                          |            |                                                            |                                               |
| rs17882143             | p.Val10Ile                               | M          | <u>0.041 (0.003, 0.079)</u><br><u>1.042 (1.003, 1.082)</u> |                                               |

Underline and Italics  $\beta$  and OR under dominant model

<sup>#</sup> SNP genotyping previously in BARCOS (Estrada *et al.* (2012)<sup>2</sup>).

**Supplementary Table S5.** PCR conditions. Sequence of the primers (5'→3'), annealing temperature (°C), amount of magnesium (mM) and elongation time at 72°C (seconds).

| Primers        | Sequence (5'→3')         | T <sub>m</sub> | Mg <sup>2+</sup> (mM) | Elongation time (s) |
|----------------|--------------------------|----------------|-----------------------|---------------------|
| WNT16-Frag1a-F | GGTAGCTCCAGTAAGAGATTC    | 62             | 2                     | 15                  |
| WNT16-Frag1a-R | CAGATTACCGTGTCTTTGGGT    |                |                       |                     |
| WNT16-Frag1b-F | CGGAGCCGCTCTCCACCA       | 62             | 2                     | 15                  |
| WNT16-Frag1b-R | ATTAGGTCACCTCGTCTAAGGG   |                |                       |                     |
| WNT16-Frag2-F  | ACTTTCAACTGAGGCTGGGG     | 62             | 2                     | 15                  |
| WNT16-Frag2-R  | CTGGAAGTGGGGAGTCAGG      |                |                       |                     |
| WNT16-Frag3-F  | CTTCCTTTCTAAATATGTAAGTCG | 58             | 2                     | 15                  |
| WNT16-Frag3-R  | AGGGCTGCCAGTGTGGTT       |                |                       |                     |
| WNT16-Frag4-F1 | TGGGACAAAAACCAAAGGACG    | 62             | 2                     | 15                  |
| WNT16-Frag4-R1 | TGACCACATGGGTGTTGTAAC    |                |                       |                     |
| WNT16-Frag4-F2 | AGGATGATCTGCTCTATGTTAAT  | 62             | 2                     | 15                  |
| WNT16-Frag4-R2 | CCCACCATTATTGAGTCCTGT    |                |                       |                     |
| DKK1-Frag1-F   | GCGCTGATCACAGTCCTTATC    | 63             | 2                     | 15                  |
| DKK1-Frag1-R   | TGCTATAACGCTCGCTGGTA     |                |                       |                     |
| DKK1-Frag2-F   | GCAGTGGGCAGTAACAGGT      | 62             | 2.5                   | 35                  |
| DKK1-Frag2-R   | TGTATTGAATCATTGAGGGACA   |                |                       |                     |
| DKK1-Frag3-F   | GAGGAAGTTTGGCTTGTGTTT    | 62             | 2                     | 15                  |
| DKK1-Frag3-R   | CGAAGGAGAAGACAGTAGGAAA   |                |                       |                     |
| DKK1-Frag4a-F  | GAACCACCTTGTCTTCAAAAATG  | 63             | 1.5                   | 20                  |
| DKK1-Frag4a-R  | TCCAAGAGATCCTTGCGTTC     |                |                       |                     |
| DKK1-Frag4b-F  | AGGTGCTGCACTGCCTATTT     | 63             | 1.5                   | 20                  |
| DKK1-Frag4b-R  | CCGTATCCTCATTCCAATCAA    |                |                       |                     |
| SOST_Frag0a_F  | CCGAGTTGGGCAGATCACC      | 62             | 1.5                   | 15                  |
| SOST_Frag0a_R  | TTAATGCAGACGGTCCAGCC     |                |                       |                     |
| SOST_Frag0b_F  | ACGCGTTCCAGGGATGAATC     | 62             | 1.5                   | 15                  |
| SOST_Frag0b_R  | GGCCAAGGCAGCATTTTCTC     |                |                       |                     |
| SOST_Frag1_F   | GCTAGAGGAGAAGTCTTGG      | 62             | 2                     | 10                  |
| SOST_Frag1_R   | CCATTCTTCCCCACCTCC       |                |                       |                     |
| SOST_Frag2a_F  | AGATGTTCAAGGGGCAAAAGC    | 63             | 2                     | 30                  |
| SOST_Frag2a_R  | GGAAGTCGGGCCCACTAG       |                |                       |                     |
| SOST_Frag2b_F  | GTCACCGAGCTGGTGTGCT      | 63             | 2                     | 30                  |
| SOST_Frag2b_R  | CTCAGGGCCTGGAAGGTCT      |                |                       |                     |
| SOST_Frag3a_F  | CTCAAGGACTTCGGGACCGA     | 62             | 2                     | 15                  |
| SOST_Frag3a_R  | AAATGAGGGTGGAGGTGG       |                |                       |                     |
| SOST_Frag3b_F  | AGTCCTGGCTCTGCCACTAA     | 60             | 2                     | 15                  |
| SOST_Frag3b_R  | GGACACATTTCTGCCTAGAAAA   |                |                       |                     |
| SOST_Frag3c_F  | GGGGGAAAAACTACAAGTGC     | 62             | 2                     | 15                  |
| SOST_Frag3c_R  | TCCTTTCCAAACCCAGACC      |                |                       |                     |
| ECR5_F         | TCCTTGCCACGGGCCACCAGCTTT | 62             | 2                     | 5                   |
| ECR5_R         | CCCCCTCATGGCTGGTCTCATTTG |                |                       |                     |

## WNT16

rs4727920; g.120965562A>G; c.65+28A>G (WNT16a) / g.120965562A>G (WNT16b);  
example of one HBM woman carrying the variant.

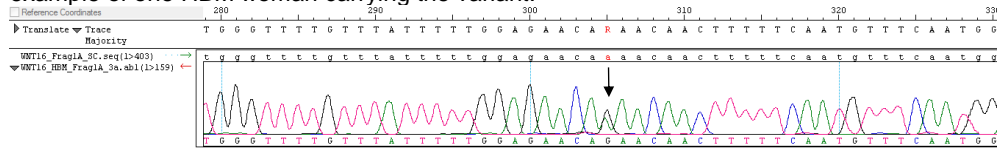

rs201022838; g.120969332C>A; c.66-289C>A (WNT16a) / c.-15C>A (WNT16b); example  
of the only HBM woman carrying the variant.

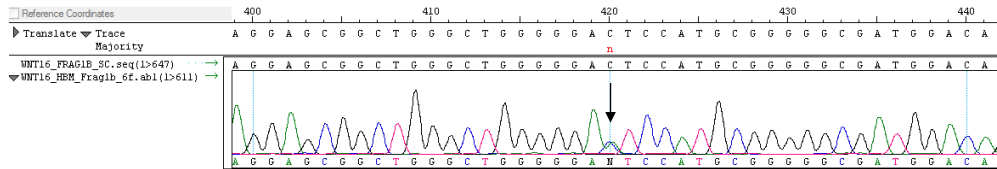

rs17143291; g.120969825C>A; p.Thr90Thr (WNT16a) / p.Thr100Thr (WNT16b); example  
of one LBM woman carrying the variant.

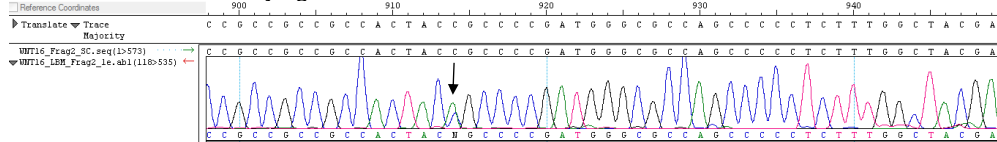

rs147496912; g.120969929G>T; c.316+58G>T (WNT16a) / c.346+58G>T (WNT16b);  
example of one HBM woman carrying the variant.

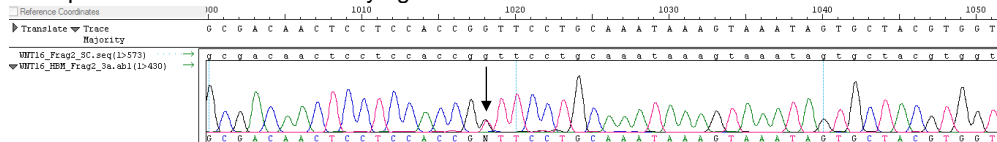

rs140239870; g.120970018A>G; c.316+147A>G (WNT16a) / c.346+147A>G (WNT16b);  
example of one LBM woman carrying the variant.

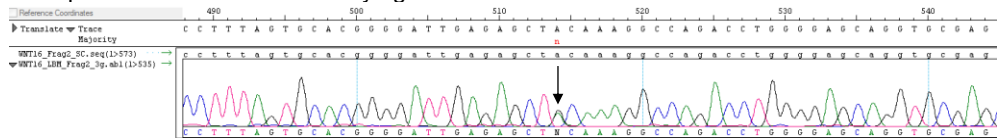

rs113001389; g.120970045C>A; c.316+174C>A (WNT16a) / c.346+174C>A (WNT16b);  
example of the only LBM woman carrying the variant.

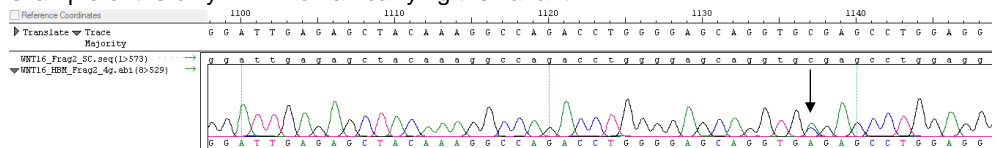

rs190011371; g.120979568G>C; g.120979568G>C (WNT16a) / c.\*169G>C (WNT16b);  
example of the only LBM woman carrying the variant.

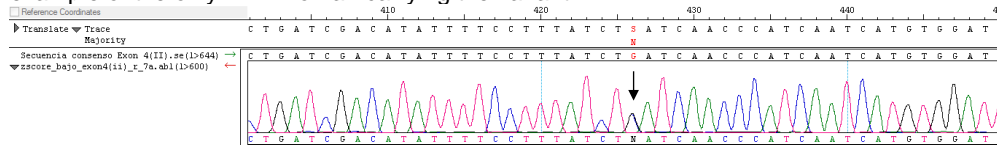

**Supplementary Figure S1.** Examples of DNA sequence chromatograms from various individuals, each containing one of the *WNT16* rare variants described in this paper. In all cases, the variants are in heterozygosis and are signaled by arrows.

## DKK1

rs540255939; g.54074079C>A; c.-116C>A; example of the only LBM woman carrying the variant.

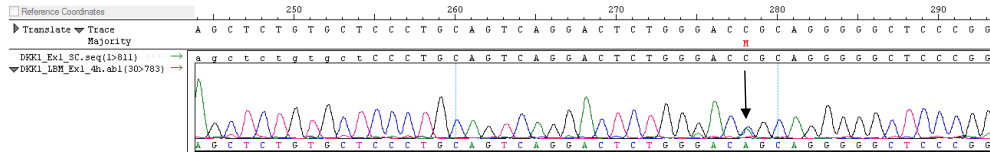

rs149268042; g.54074798G>T; p.Arg120Leu; example of the only HBM woman carrying the variant.

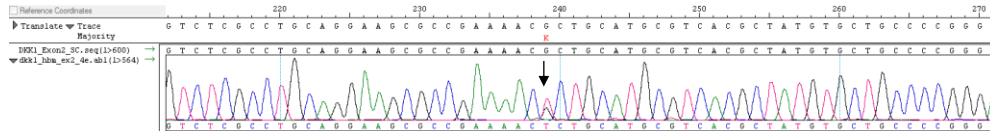

c.406+195G>A; g.54075040G>A; example of the only HBM woman carrying the variant.

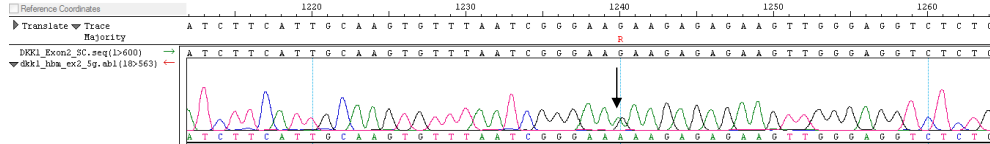

rs200054686; g.54076944delT; c.\*377delT, example of the only LBM woman carrying the variant.

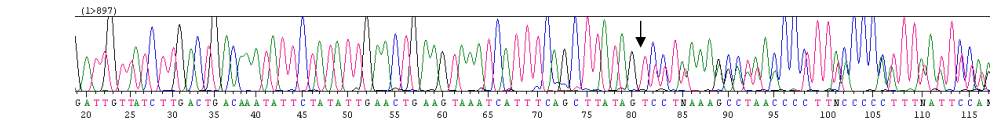

rs953208416; g.54077319C>T; c.\*752C>T, example of the only HBM woman carrying the variant.

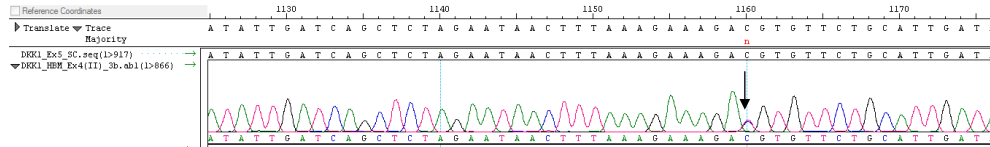

rs79759877; g.54077322G>A; c.\*755G>A; example of the only HBM woman carrying the variant.

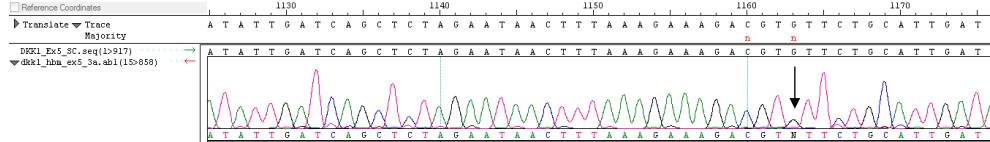

rs549135224; g.54077585G>A; example of one HBM woman carrying the variant.

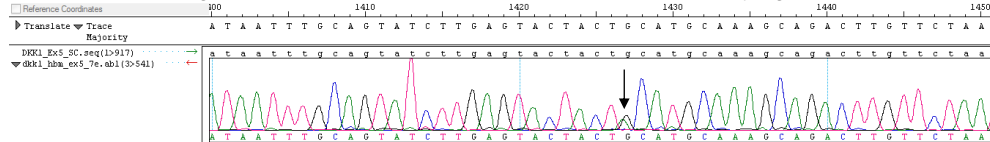

**Supplementary Figure S2.** Examples of DNA sequence chromatograms from various individuals, each containing one of the *DKK1* rare variants described in this paper. In all cases, the variants are in heterozygosis and are signaled by arrows. In the case of rs20054686, which is a heterozygous deletion, the whole chromatogram to the right of it is affected.



## SOST

rs184269196; g.41838340G>A; example of one HBM woman carrying the variant.

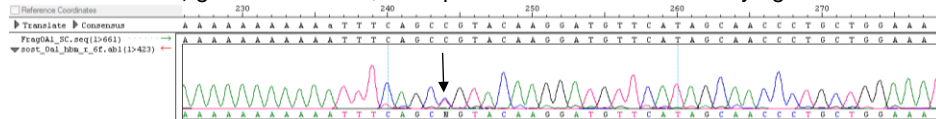

rs79715828; g.41838130G>A; example of the only HBM woman carrying the variant.

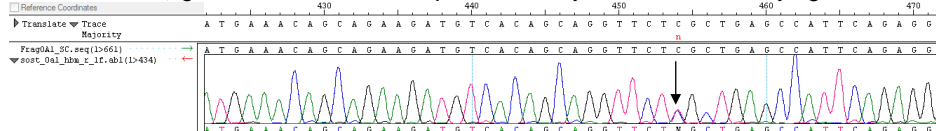

rs74252774; g.41838012G>T; example of the only HBM woman carrying the variant.

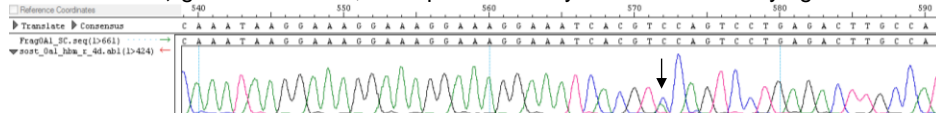

rs567865956; g.41837786C>T; example of one HBM woman carrying the variant.

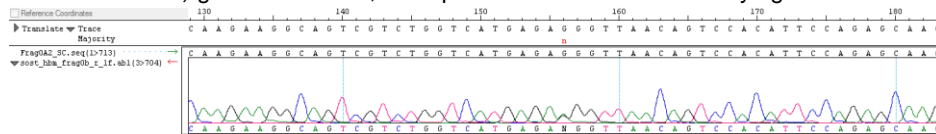

rs61105240; g.41837720C>T; example of the only HBM woman carrying the variant.

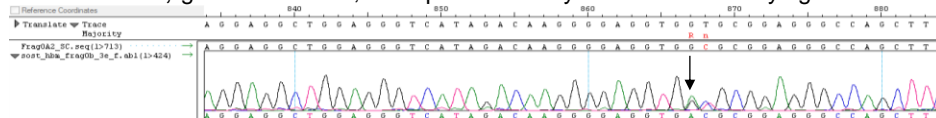

rs115185703; g.41837530C>A; example of the only HBM woman carrying the variant.

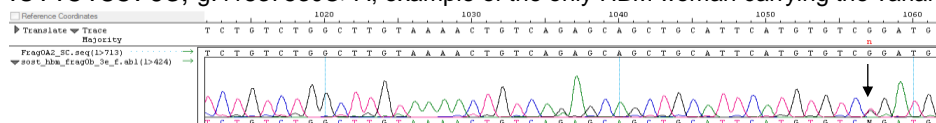

rs570754792; g.41836179G>A; example of the only LBM woman carrying the variant.

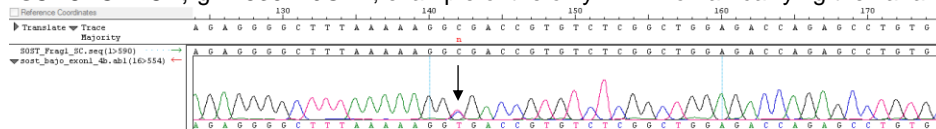

rs17886183; g.41831706C>T; example of one HBM woman carrying the variant.

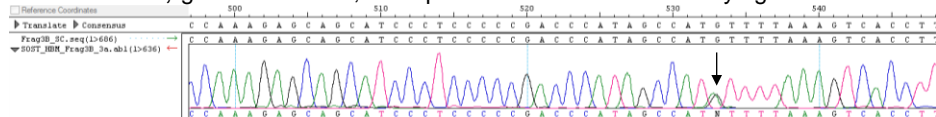

rs17885979; g.41831307delC; c.\*1404delG; example of the only HBM woman carrying the variant.

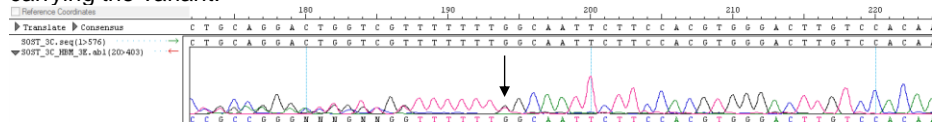

rs566556646; g.41831153C>G; c.\*1557G>C; example of the only HBM woman carrying the variant.

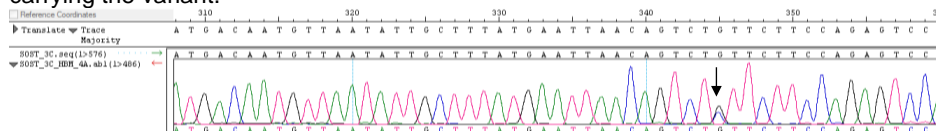

**Supplementary Figure S3.** Examples of DNA sequence chromatograms from various individuals, each containing one of the *SOST* rare variants described in this paper. In all cases, the variants are in heterozygosis and are signaled by arrows. In the case of rs17885979, which is a heterozygous deletion, the whole chromatogram to the right of it is affected.

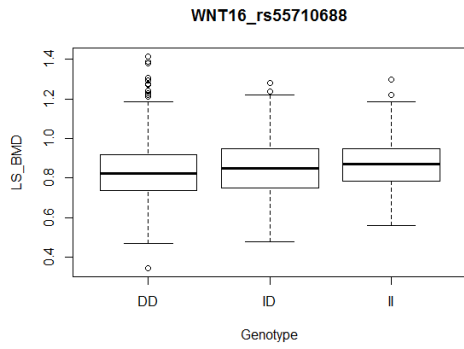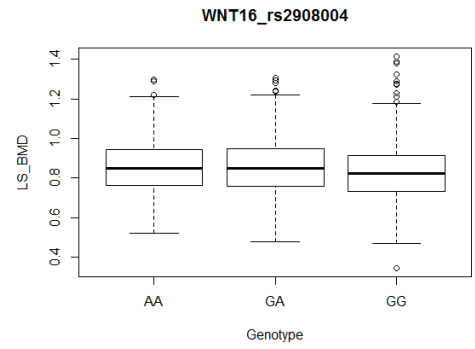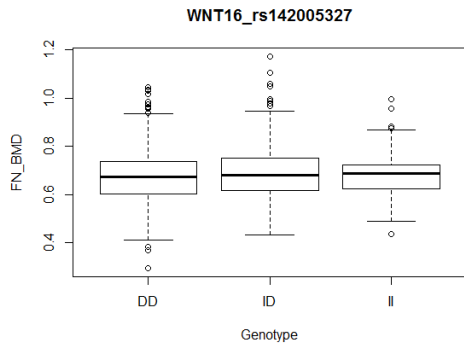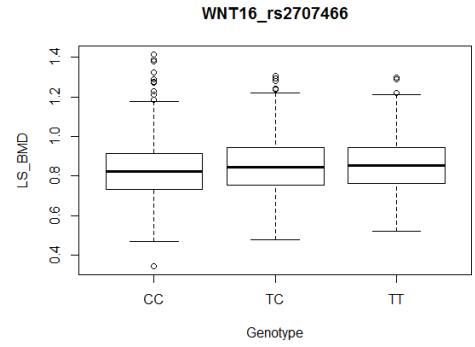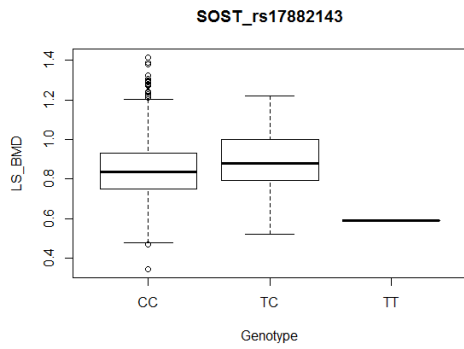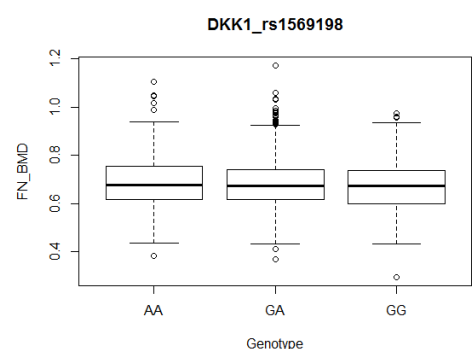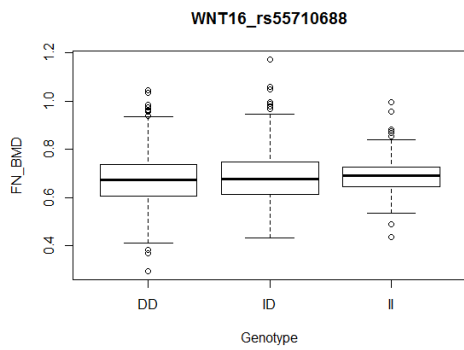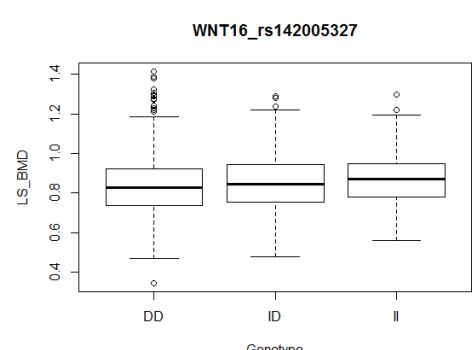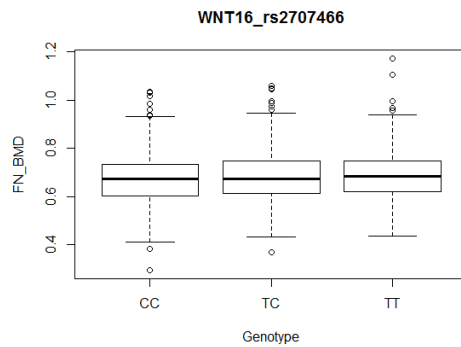

**Supplementary Figure S4.** Boxplots for the nominally significant associated SNPs rs55710688, rs2908004, rs142005327, rs2707466, rs17882143, rs1569198 with LS-BMD or FN-BMD.

## References

1. De-Ugarte, L. et al. MiRNA profiling of whole trabecular bone: identification of osteoporosis-related changes in MiRNAs in human hip bones. *BMC Med. Gen.* 8:75 (2015)
2. Estrada, K. *et al.* Genome-wide meta-analysis identifies 56 bone mineral density loci and reveals 14 loci associated with risk of fracture. *Nat. Genet.* **44**, 491–501 (2012).
